# Supplementary material for: A Novel CDK4/6 and PARP Dual Inhibitor ZC-22 Effectively Suppresses Tumor Growth and Improves the Response to Cisplatin Treatment in Breast and Ovarian Cancer
Source: Int J Mol Sci. 2022 Mar 7;23(5):2892. doi: 10.3390/ijms23052892 (PMC8911181; doi:10.3390/ijms23052892)
Supplement: Supplementary file 1 [file ijms-23-02892-s001.zip › ijms-1579490-supplementary.pdf]

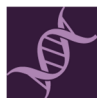

Article

# A Novel CDK4/6 and PARP Dual Inhibitor ZC-22 Effectively Suppresses Tumor Growth and Improves the Response to Cisplatin Treatment in Breast and Ovarian Cancer

Chenchen Tian <sup>1,†</sup>, Yufan Wei <sup>1,†</sup>, Jianjun Li <sup>1</sup>, Zhi Huang <sup>1</sup>, Qiong Wang <sup>1</sup>, Yingxue Lin <sup>1</sup>, Xingping Lv <sup>1</sup>, Yanan Chen <sup>1</sup>, Yan Fan <sup>1</sup>, Peiqing Sun <sup>2</sup>, Rong Xiang <sup>1</sup>, Antao Chang <sup>3,\*</sup> and Shuang Yang <sup>1,\*</sup>

- <sup>1</sup> Tianjin Key Laboratory of Tumor Microenvironment and Neurovascular Regulation, School of Medicine, Nankai University, Tianjin 300071, China; tianchenchen@ucas.ac.cn (C.T.); weiyufan@mail.nankai.edu.cn (Y.W.); lijianjun@mail.nankai.edu.cn (J.L.); huangzhi@mail.nankai.edu.cn (Z.H.); qiongwang2022@gmail.com (Q.W.); linyingxue@mail.nankai.edu.cn (Y.L.); lvxingping107@mail.nankai.edu.cn (X.L.); chenyanan@nankai.edu.cn (Y.C.); yanfan@nankai.edu.cn (Y.F.); rxiang@nankai.edu.cn (R.X.)
- <sup>2</sup> Department of Cancer Biology and Comprehensive Cancer Center, Wake Forest Baptist Medical Center, Winston Salem, NC 27157, USA; psun@wakehealth.edu
- <sup>3</sup> Department of Pancreatic Cancer, Tianjin Medical University Cancer Institute and Hospital, Tianjin 300060, China
- \* Correspondence: changantao@tjmuch.com or changantao@nankai.edu.cn (A.C.); yangshuang@nankai.edu.cn (S.Y.); Tel.: +86-022-2350-9557 (A.C.)
- † These authors contribute equally to the work.

**This file includes Figure S1 to S5.**

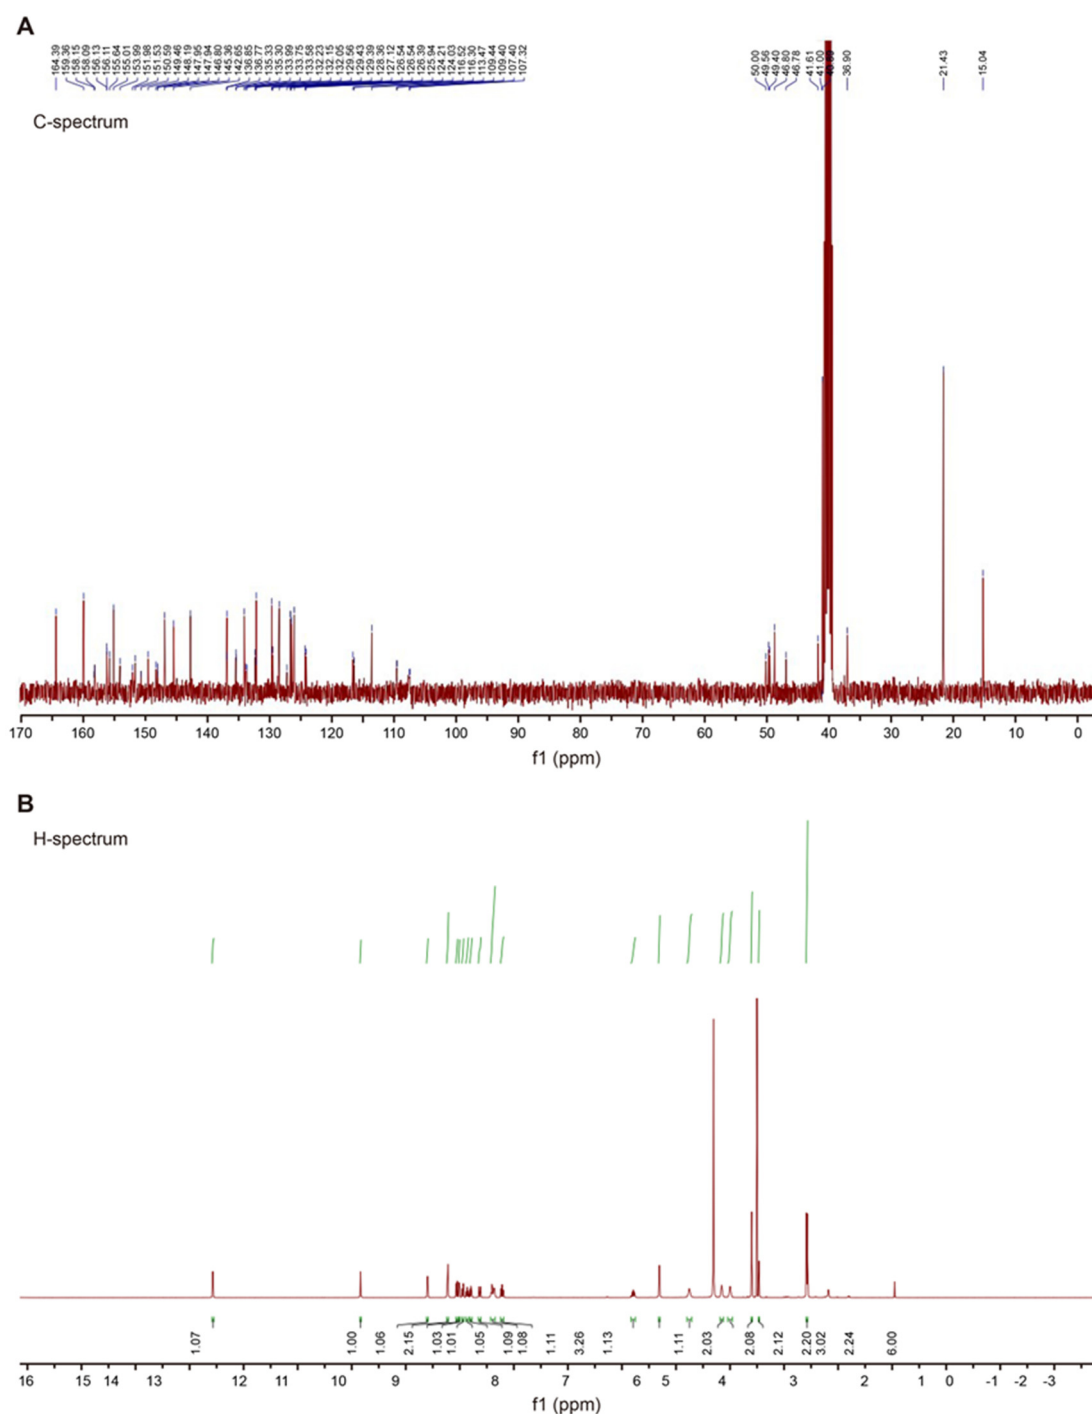

**Figure S1.** Chemical characterization of ZC-22. **(A)**  $^{13}\text{C}$  NMR spectrum of ZC-22. Parameters: (101 MHz, DMSO- $d_6$ )  $\delta$  164.30, 159.86, 158.08, 156.13, 155.01, 148.19, 147.94, 146.80, 145.36, 142.65, 136.77, 135.34, 133.99, 132.23, 132.05, 129.56, 129.43, 128.36, 126.54, 126.39, 125.94, 124.21, 116.52, 113.47, 109.40, 49.56, 49.40, 48.60, 46.78, 41.61, 40.89, 36.90, 21.43, 15.04. ESI-HRMS  $m/z$  calcd 745.2904  $[\text{M}+\text{H}]^+$ , found 745.2976  $[\text{M}+\text{H}]^+$ . **(B)**  $^1\text{H}$  NMR spectrum of ZC-22. Parameters: (400 MHz, DMSO- $d_6$ )  $\delta$  12.57 (s, 1H), 9.83 (s, 1H), 8.60 (d,  $J$  = 3.9 Hz, 1H), 8.22 (dd,  $J$  = 7.4, 1.2 Hz, 2H), 8.05 (d,  $J$  = 9.1 Hz, 1H), 8.01 (d,  $J$  = 2.9 Hz, 1H), 7.94 (dt,  $J$  = 8.2, 1.1 Hz, 1H), 7.86 (ddd,  $J$  = 8.1, 7.2, 1.5 Hz, 1H), 7.80 (dd,  $J$  = 7.8, 1.2 Hz, 1H), 7.63 (dd,  $J$  = 11.8, 1.3 Hz, 1H), 7.44 – 7.33 (m, 3H), 7.21 (t,  $J$  = 9.0 Hz, 1H), 4.90 – 4.70 (m, 1H), 4.30 (s, 2H), 3.75 (s, 2H), 3.15 (t,  $J$  = 5.2 Hz, 2H), 3.00 (s, 2H), 2.60 (s, 3H), 2.46 (p,  $J$  = 1.9 Hz, 2H), 1.57 (d,  $J$  = 6.9 Hz, 6H).

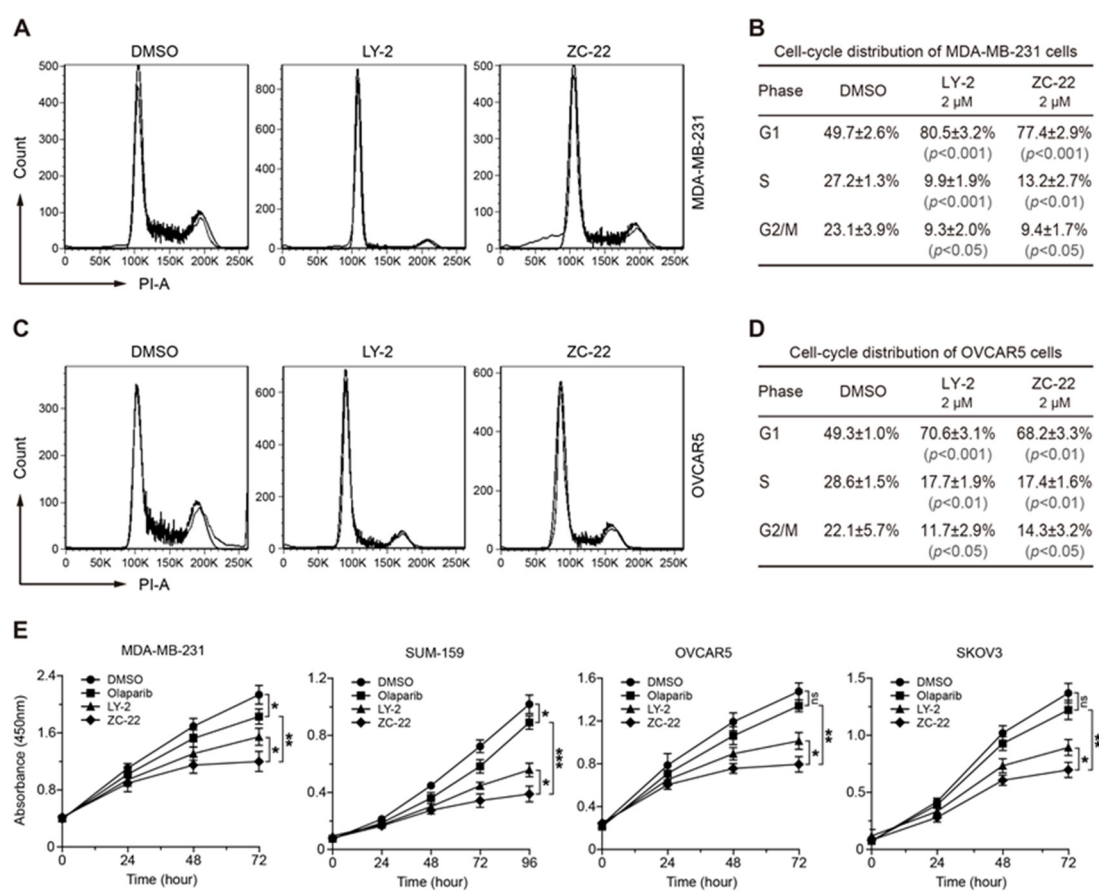

**Figure S2.** ZC-22 induces cell cycle arrest and inhibits proliferation of breast and ovarian cancer cells. **(A,B)** Cell-cycle analysis of MDA-MB-231 cells treated with 2  $\mu$ M LY2835219 (LY-2) or ZC-22 for 24 h. Representative pictures of cell-cycle staining are shown in **(A)**, and quantification of percentage of cells at each phase is listed in **(B)** as means  $\pm$  SD,  $n = 3$ .  $p$  value was calculated using an unpaired  $t$ -test for comparisons with the DMSO-treated group at each phase. **(C-D)** Cell-cycle analysis of OVCAR5 cells treated with 0.5  $\mu$ M LY-2 or ZC-22 for 24 h. Representative pictures are shown in **(C)**, and quantification of percentage of cells at each phase is listed in **(D)** as means  $\pm$  SD,  $n = 3$ .  $p$  value was calculated using an unpaired  $t$ -test for comparisons with the DMSO-treated group. **(E)** Cell proliferation assay of breast and ovarian cancer cells with indicated treatment in a time course manner. MDA-MB-231 cells were treated with 2  $\mu$ M Olaparib, LY-2, or ZC-22 alone. SUM-159, OVCAR5 and SKOV3 cells were treated with 0.5  $\mu$ M Olaparib, LY-2, or ZC-22 alone. Cell proliferation was analyzed by CCK8 assays at the indicated time point. Values are means  $\pm$  SD,  $n = 3$ . ns, not significant, \*  $p$ <0.05, \*\*  $p$ <0.01, and \*\*\*  $p$ <0.001 in the unpaired  $t$ -test.

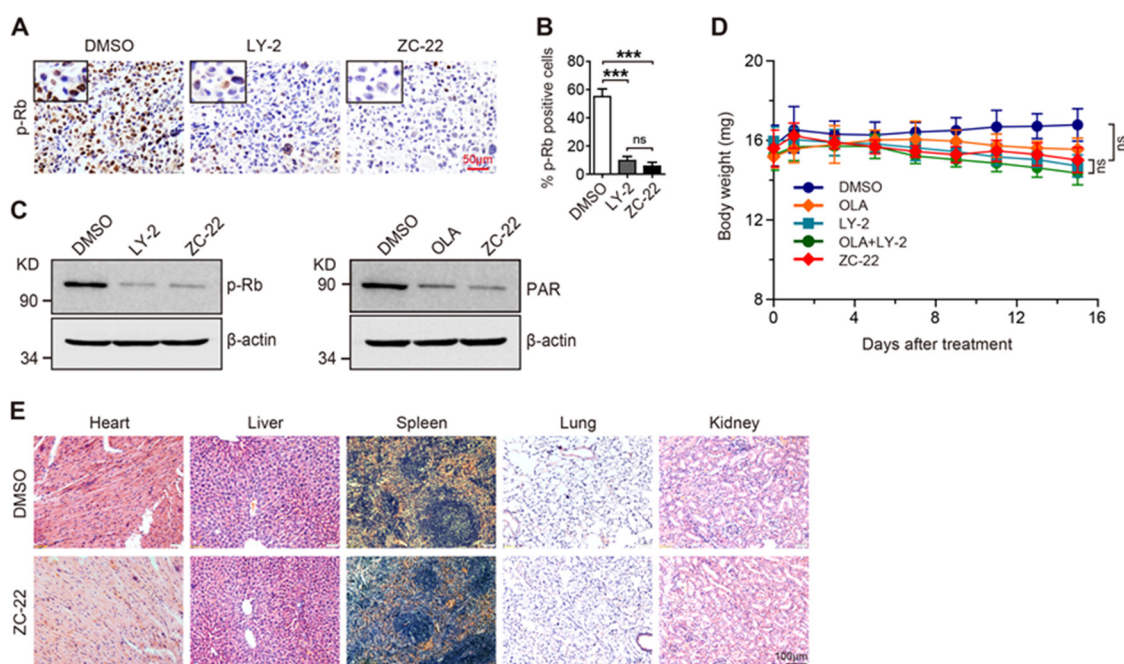

**Figure S3.** ZC-22 inhibits signaling of CDK4/6 and PARP in xenograft tumors of breast cancer. Female NOD-SCID mice were injected subcutaneously with  $2 \times 10^6$  of MDA-MB-231 cells and treated ip daily with 50 mg/kg of Olaparib (OLA) or LY2835219 (LY-2) alone or together (OLA+LY-2), or ZC-22 starting on day 10 after injection of cells when tumors were 50–80 mm<sup>3</sup> in size. Representative pictures of (A) and quantification of percentage of (B) phosphorylated Rb (p-Rb)-positive cells in immunohistochemical staining of the MDA-MB-231 xenograft tumor tissues. Values are means ± SEM, *n* = 6. ns, not significant, and \*\*\* *p* < 0.001 in the unpaired *t*-test. (C) Western blot analysis of p-Rb (Left) and PARP (Right) in the MDA-MB-231 xenograft tumor tissues with indicated treatment. (D) Body weights of MDA-MB-231 tumor burden mice with indicated treatment. Values are means ± SD, *n* = 6. ns, not significant in unpaired *t*-test. (E) H&E staining of the heart, liver, spleen, lung, and kidney tissues of tumor-bearing mice treated with DMSO or ZC-22, showing the lack of toxicity of ZC-22 treatment.

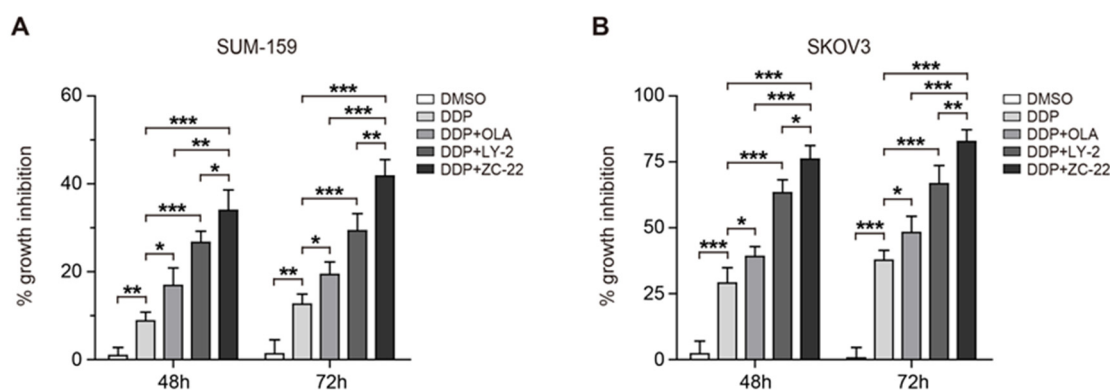

**Figure S4.** ZC-22 increases the sensitivity of breast and ovarian cancer cells to cisplatin. (A) CCK8 assay of SUM-159 cells treated with 2.5 μM cisplatin (DDP) alone or together with 0.5 μM Olaparib (OLA), LY2835219 (LY-2), or ZC-22 for 48 or 72 h. Values are means ± SD, *n* = 4. \* *p* < 0.05, \*\* *p* < 0.01, and \*\*\* *p* < 0.001 using unpaired *t*-test. (B) CCK8 assay of SKOV3 cells treated with 5 μM DDP alone or together with 0.5 μM OLA, LY-2, or ZC-22 for 48 or 72 h. Values are means ± SD, *n* = 4. \* *p* < 0.05, \*\* *p* < 0.01, and \*\*\* *p* < 0.001 using the unpaired *t*-test.

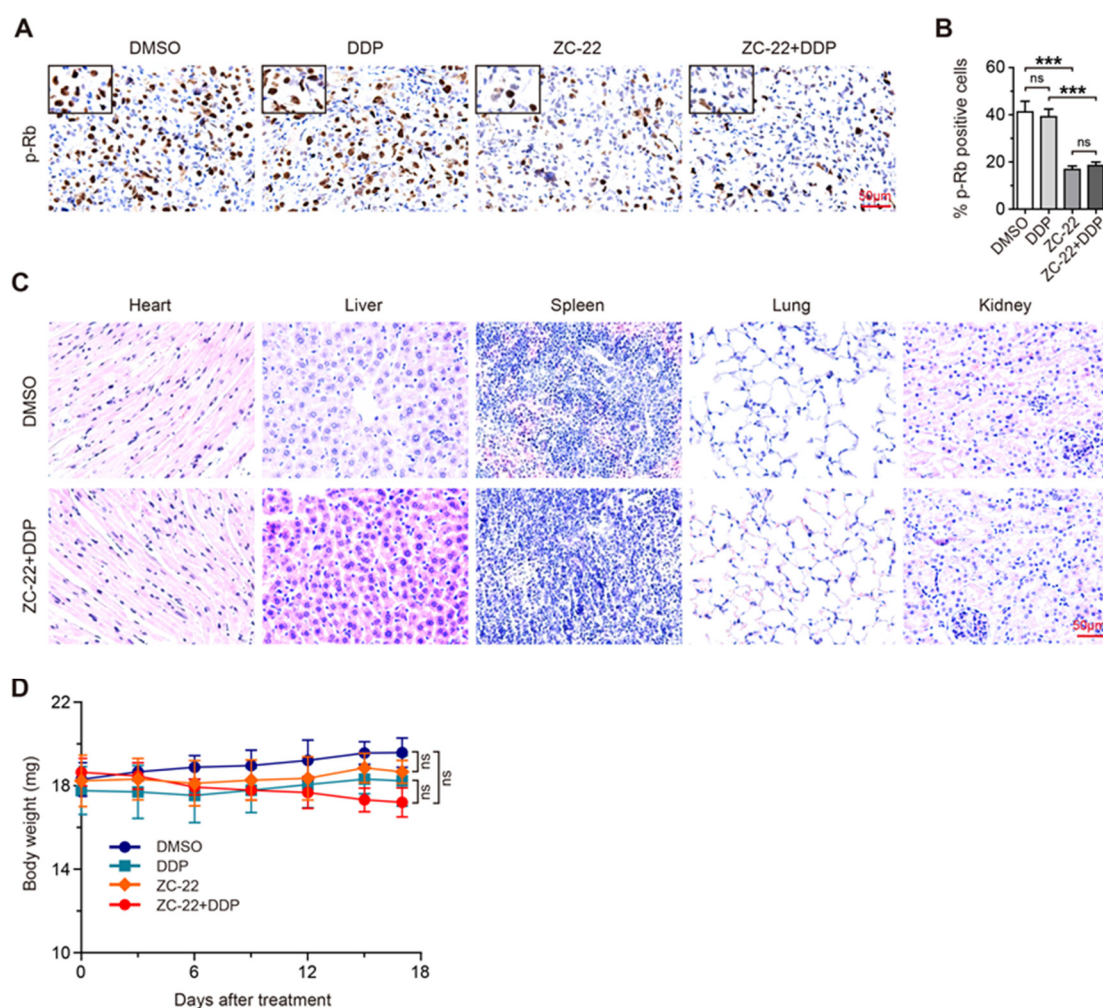

**Figure S5.** ZC-22 suppresses CDK4/6 signaling in xenograft tumors of ovarian cancer. Female NOD-SCID mice were injected subcutaneously with  $8 \times 10^6$  of OVCAR5 cells and treated ip daily with 1.5 mg/kg of cisplatin (DDP) or 50 mg/kg of ZC-22 alone or together (ZC-22+DDP) starting on day 10 after injection of cells when tumors were 50–70 mm<sup>3</sup> in size. **(A)** Immunohistochemical staining of phosphorylated Rb (p-Rb) in the OVCAR5 xenograft tumor tissues. **(B)** Quantification of the p-Rb-positive cells in immunohistochemical staining of the OVCAR5 xenograft tumor tissues in **(A)**. Values are means  $\pm$  SEM,  $n = 6$ . ns, not significant, and \*\*\*  $p < 0.001$  in unpaired  $t$ -test. **(C)** H&E staining of the heart, liver, spleen, lung, and kidney tissues of tumor-bearing mice treated with DMSO or ZC-22 together with DDP, showing the lack of toxicity of combined ZC-22 and DDP treatment. **(D)** Body weights of OVCAR5 tumor burden mice with indicated treatment. Values are means  $\pm$  SD,  $n = 6$ . ns, not significant in unpaired  $t$ -test.
